# Supplementary material for: Silicon nitride waveguides with directly grown WS2for efficient second-harmonic generation
Source: Royal Society of Chemistry journal article supplement (doi:10.1039/d1nr06216f), 2021-11-15
Supplement: d1nr06216f1.pdf [file d1nr06216f1.pdf]

## Supplementary Materials for

### **Silicon nitride waveguides with directly grown WS<sub>2</sub> for efficient second-harmonic generation**

Ning Liu,<sup>‡<sup>a</sup></sup> Xi Yang,<sup>‡<sup>a</sup></sup> Zhihong Zhu,<sup>a</sup> Feng Chen,<sup>b</sup> Yangbo Zhou,<sup>b</sup> Jipeng Xu,<sup>a</sup> and Ken Liu<sup>\*<sup>a</sup></sup>

<sup>a</sup>*College of Advanced Interdisciplinary Studies & Hunan Provincial Key Laboratory of Novel Nano-Optoelectronic Information Materials and Devices, National University of Defense Technology, Changsha 410073, P. R. China. E-mail: [liukener@163.com](mailto:liukener@163.com)*

<sup>b</sup>*School of Materials Science and Engineering, Nanchang University, Nanchang 330031, P. R. China.*

<sup>‡</sup>These authors contributed equally to this work.

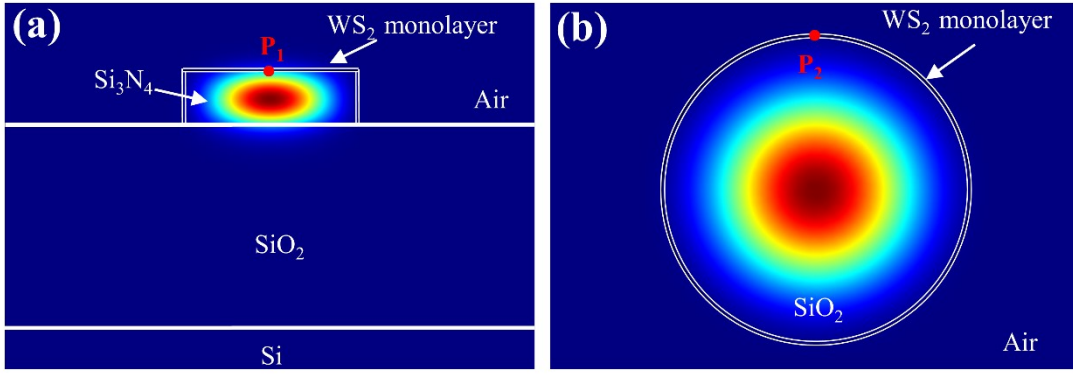

**Fig. S1.** Fundamental TE mode distribution of Si<sub>3</sub>N<sub>4</sub> waveguide and silica fiber covered by a monolayer WS<sub>2</sub>. (a) Fundamental TE mode distribution of the TE mode in the Si<sub>3</sub>N<sub>4</sub>/WS<sub>2</sub> hybrid waveguide structure. The width and the height of the Si<sub>3</sub>N<sub>4</sub> waveguide is 2.0 μm and 0.6 μm, respectively. The thickness of the WS<sub>2</sub> monolayer is set to be 0.65 nm. (b) Fundamental TE mode distribution of a microfiber covered by a monolayer WS<sub>2</sub>. The diameter of the core is set to be 4 μm.

We use the simulation software “COMSOL”. The wavelength is set to be 1,550 nm and the refractive index  $n$  of monolayer WS<sub>2</sub> is set to be 4.5.<sup>1</sup> Fig. 1 shows the fundamental TE mode distribution of the Si<sub>3</sub>N<sub>4</sub> waveguide covered by a monolayer WS<sub>2</sub> on the top and both sides and a 4 μm-diameter microfiber also covered by a monolayer WS<sub>2</sub>. The confinement factor of the monolayer WS<sub>2</sub> can be expressed as:<sup>2</sup>

$$\Gamma = \frac{\int_{ws_2} \varepsilon_{ws_2} |E_{\parallel}|^2 dV}{\int_V \varepsilon |E|^2 dV}$$

Where  $\varepsilon$  is the dielectric constant, and  $E_{\parallel}$  is the electric field in the analyzing plane.  $\Gamma \approx 0.17\%$  for the Si<sub>3</sub>N<sub>4</sub>/WS<sub>2</sub> hybrid waveguide and  $\Gamma \approx 0.065\%$  for the SiO<sub>2</sub>/WS<sub>2</sub> microfiber. The confinement factor in the hybrid waveguide is 162% higher than that in the microfiber.

For the same pump power, we calculated the magnitude of electric field  $|E|$  in the monolayer WS<sub>2</sub> for the P<sub>1</sub> point in Fig. 1(a) and the P<sub>2</sub> point in Fig. 1(b). The results show that the value of  $|E|$  at P<sub>1</sub> is about 27 times as much as that of the point P<sub>2</sub>, which means that the second-order nonlinearity of the Si<sub>3</sub>N<sub>4</sub>/WS<sub>2</sub> hybrid waveguide is much higher than that of the microfiber covered by a monolayer WS<sub>2</sub>, since the SHG effect is proportional to  $|E|^2$ .



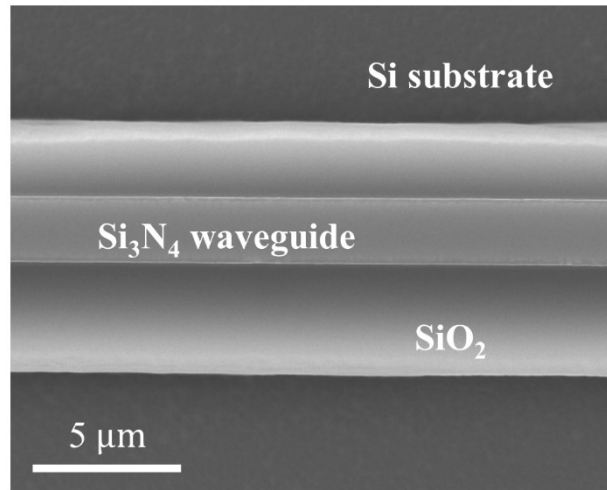

**Fig. S2.** SEM image of the Si<sub>3</sub>N<sub>4</sub> waveguide with SiO<sub>2</sub> etched at both sides before the subsequent WS<sub>2</sub> growth.

## References

- 1 H. L. Liu, C. C. Shen, S. H. Su, C. L. Hsu, M. Y. Li and L. J. Li, *Appl. Phys. Lett.*, 2014, **105**, 4.
- 2 Y. Ye, Z. J. Wong, X. F. Lu, X. J. Ni, H. Y. Zhu, X. H. Chen, Y. Wang and X. Zhang, *Nat. Photonics*, 2015, **9**, 733-737.
